# Supplementary material
Source: publisher figshare collection journal article supplement (https://tandf.figshare.com/articles/dataset/_/6981764)
Supplement: Supplementary file 1 [file 1]

Archive with 3 entries (3 files):
- Supplemental Figure.pdf
- Supplementary Table.pdf
- ncer-2017-0673-File006.jpg
