# Supplementary material
Source: publisher figshare collection journal article supplement (https://tandf.figshare.com/articles/dataset/_/6981764)
Supplement: Supplementary file 1 [file 1 › Supplemental Figure.pdf]

Supplemental Figure: Dual labeling for CD68 (A, red, 400x) and CD163 (B, green, 400x) in a fibrosing BCC: M1-M $\Phi$  (bold arrow) are labelled red whereas M2-M $\Phi$  (arrow) appear yellow (C, merged image, 400x; nuclear DAPI staining = blue).

Supplemental Table: Data for each tumor showing demographical information, localisation and type of tumor, inflammatory score as well as the immunohistochemistry and immunofluorescence results for COX-2, Ki67, macrophages.
