# Supplementary material
Source: publisher figshare collection journal article supplement (https://tandf.figshare.com/articles/dataset/_/6981764)
Supplement: Supplementary file 1 [file 1 › Supplementary Table.pdf]

| Number | BCC<br>1=Nodular<br>2= Fibrosing | Localisation        | Age | Sex | Infl.<br>Score | COX-2<br>Score | Mph<br>within<br>tumor<br>islands/<br>VF (IHC) | Mph<br>within<br>stroma/<br>VF (IHC) | Mph/ VF<br>(IHC) | M1-<br>Mph /<br>Image<br>(IF) | M2-<br>Mph /<br>Image<br>(IF) | Ki67<br>Score<br>(%) | M1/M2<br>Ratio |
|--------|----------------------------------|---------------------|-----|-----|----------------|----------------|------------------------------------------------|--------------------------------------|------------------|-------------------------------|-------------------------------|----------------------|----------------|
| 1      | 1                                | Lower eyelid        | 88  | m   | 2              | 0              | 3                                              | 20                                   | 11               | 19                            | 19                            | 27                   | 1,19           |
| 2      | 1                                | Medial canthus      | 73  | m   | 2              | 0              | 4                                              | 10                                   | 7                | 8                             | 23                            | 12                   | 0,60           |
| 3      | 2                                | Lower eyelid        | 97  | f   | 3              | 3              | 4                                              | 26                                   | 15               | 23                            | 29                            | 29                   | 0,89           |
| 4      | 2                                | Lower eyelid        | 69  | f   | 3              | 1              | 11                                             | 18                                   | 14               | 11                            | 20                            | 13                   | 1,06           |
| 5      | 2                                | Lower eyelid        | 86  | m   | 3              | 0              | 15                                             | 22                                   | 18               | 37                            | 15                            | 6                    | 2,64           |
| 6      | 1                                | Upper eyelid        | 74  | f   | 2              | 0              | 5                                              | 11                                   | 8                | 21                            | 7                             | 31                   | 9,25           |
| 7      | 1                                | Medial canthus      | 75  | f   | 2              | 1              | 7                                              | 17                                   | 12               | 15                            | 18                            | 15                   | 1,08           |
| 8      | 1                                | Lower eyelid        | 70  | f   | 2              | 1              | 8                                              | 21                                   | 14               | 22                            | 23                            | 44                   | 3,11           |
| 9      | 2                                | Lower eyelid        | 75  | f   | 2              | 2              | 5                                              | 22                                   | 14               | 16                            | 27                            | 8                    | 0,96           |
| 10     | 1                                | Medial canthus      | 56  | f   | 1              | 0              | 7                                              | 17                                   | 12               | 16                            | 24                            | 10                   | 0,49           |
| 11     | 2                                | Medial canthus      | 49  | f   | 2              | 2              | 3                                              | 4                                    | 3                | 4                             | 8                             | 14                   | 0,80           |
| 12     | 1                                | Lower eyelid        | 77  | m   | 2              | 0              | 6                                              | 17                                   | 11               | 32                            | 4                             | 42                   | 11,03          |
| 13     | 1                                | Medial canthus      | 84  | f   | 1              | 0              | 2                                              | 14                                   | 8                | 24                            | 33                            | 9                    | 0,90           |
| 14     | 2                                | Lower eyelid        | 68  | f   | 3              | 2              | 17                                             | 41                                   | 29               | 71                            | 50                            | 30                   | 1,34           |
| 15     | 1                                | Medial canthus      | 85  | m   | 1              | 1              | 2                                              | 11                                   | 7                | 0                             | 13                            | 11                   | 0,13           |
| 16     | 1                                | Lower eyelid        | 68  | f   | 2              | 1              | 2                                              | 9                                    | 6                | 18                            | 13                            | 17                   | 1,78           |
| 17     | 2                                | Lower eyelid        | 62  | f   | 3              | 2              | 1                                              | 11                                   | 6                | 34                            | 10                            | 6                    | 10,20          |
| 18     | 1                                | Upper eyelid        | 49  | f   | 2              | 0              | 7                                              | 38                                   | 22               | 28                            | 41                            | 10                   | 0,92           |
| 19     | 2                                | Lower eyelid        | 86  | f   | 3              | 0              | 12                                             | 31                                   | 21               | 31                            | 44                            | 18                   | 0,73           |
| 20     | 2                                | Lower eyelid        | 70  | f   | 2              | 1              | 2                                              | 19                                   | 11               | 26                            | 14                            | 13                   | 2,17           |
| 21     | 1                                | Lower eyelid        | 70  | f   | 2              | 1              | 3                                              | 7                                    | 5                | 10                            | 27                            | 30                   | 0,55           |
| 22     | 1                                | Temporal<br>canthus | 70  | m   | 1              | 1              | 1                                              | 7                                    | 4                | 0                             | 4                             | 12                   | 0,00           |
| 23     | 2                                | Lower eyelid        | 78  | m   | 3              | 0              | 1                                              | 15                                   | 8                | 17                            | 13                            | 9                    | 1,85           |
| 24     | 2                                | Lower eyelid        | 66  | f   | 2              | 2              | 5                                              | 32                                   | 18               | 3                             | 8                             | 36                   | 0,39           |
| 25     | 2                                | Lower eyelid        | 74  | m   | 3              | 3              | 4                                              | 15                                   | 10               | 16                            | 6                             | 35                   | 3,21           |
| 26     | 2                                | Lower eyelid        | 77  | m   | 2              | 0              | 0                                              | 17                                   | 9                | 16                            | 38                            | 23                   | 4,45           |
| 27     | 1                                | Medial canthus      | 78  | f   | 1              | 0              | 0                                              | 3                                    | 2                | 8                             | 13                            | 8                    | 0,68           |
| 28     | 2                                | Upper eyelid        | 80  | f   | 3              | 2              | 0                                              | 13                                   | 6                | 36                            | 39                            | 17                   | 6,93           |

|    |   |              |    |   |   |   |   |   |   |    |    |    |      |
|----|---|--------------|----|---|---|---|---|---|---|----|----|----|------|
| 29 | 1 | Upper eyelid | 81 | m | 1 | 0 | 1 | 5 | 3 | 33 | 18 | 13 | 1,91 |
| 30 | 2 | Lower eyelid | 86 | m | 2 | 1 | 0 | 3 | 2 | 18 | 8  | 23 | 3,87 |

BCC: basal cell carcinoma

Infl.: inflammatory score

Mph: macrophage

IHC: immunohistochemistry

IF: immunofluorescence

VF: visual field
