# Supplementary material
Source: publisher figshare collection journal article supplement (https://tandf.figshare.com/articles/dataset/_/6981764)

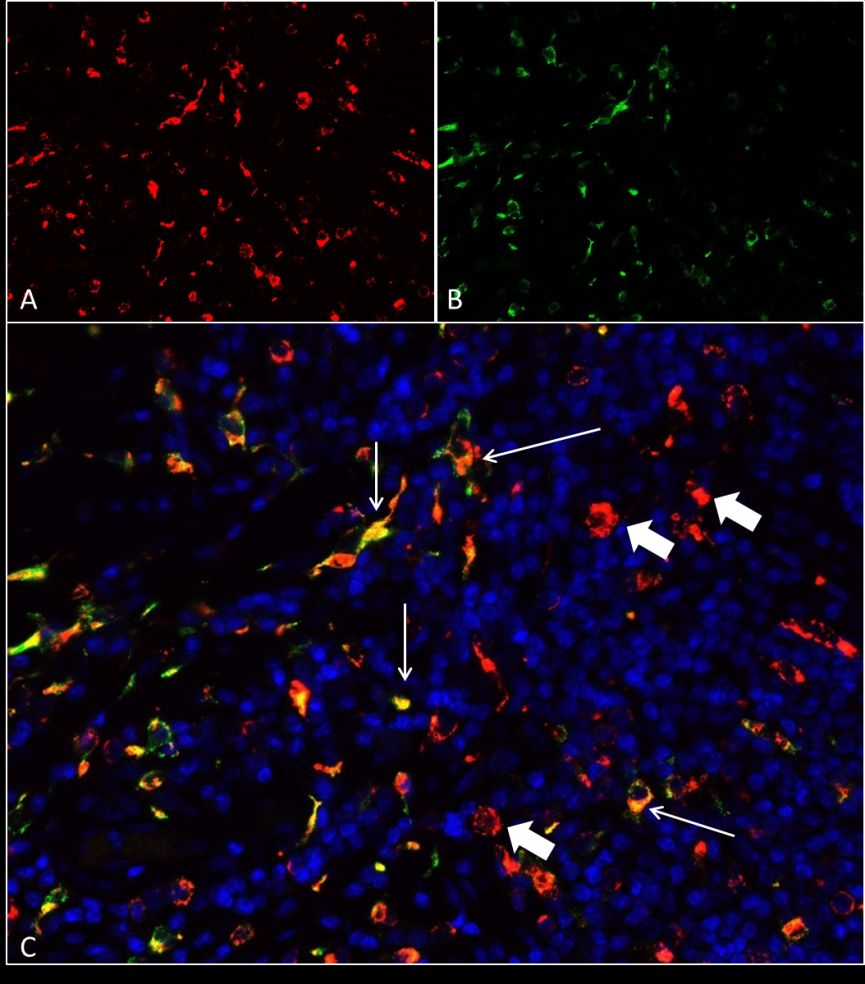

Supplement: Supplementary file 1 [file 1 › ncer-2017-0673-File006.jpg]
